# Supplementary material for: New insights from GWAS on BMI-related growth traits in a longitudinal cohort of admixed children with Native American and European ancestry
Source: PubMed Central journal article supplement — iScience. 2023 Jan 31;26(2):106091. doi: 10.1016/j.isci.2023.106091 (PMC9947275; doi:10.1016/j.isci.2023.106091), 2023-01-31
Supplement: mmc1.pdf [file mmc1.pdf]

**Supplemental information**

**New insights from GWAS on BMI-related growth  
traits in a longitudinal cohort of admixed  
children with Native American and European ancestry**

**Lucas Vicuña, Esteban Barrientos, Tomás Norambuena, Danilo Alvares, Juan Cristobal Gana, Valeria Leiva-Yamaguchi, Cristian Meza, José L. Santos, Veronica Mericq, Ana Pereira, and Susana Eyheramendy**

SUPPLEMENTAL INFORMATION

SUPPLEMENTAL FIGURES

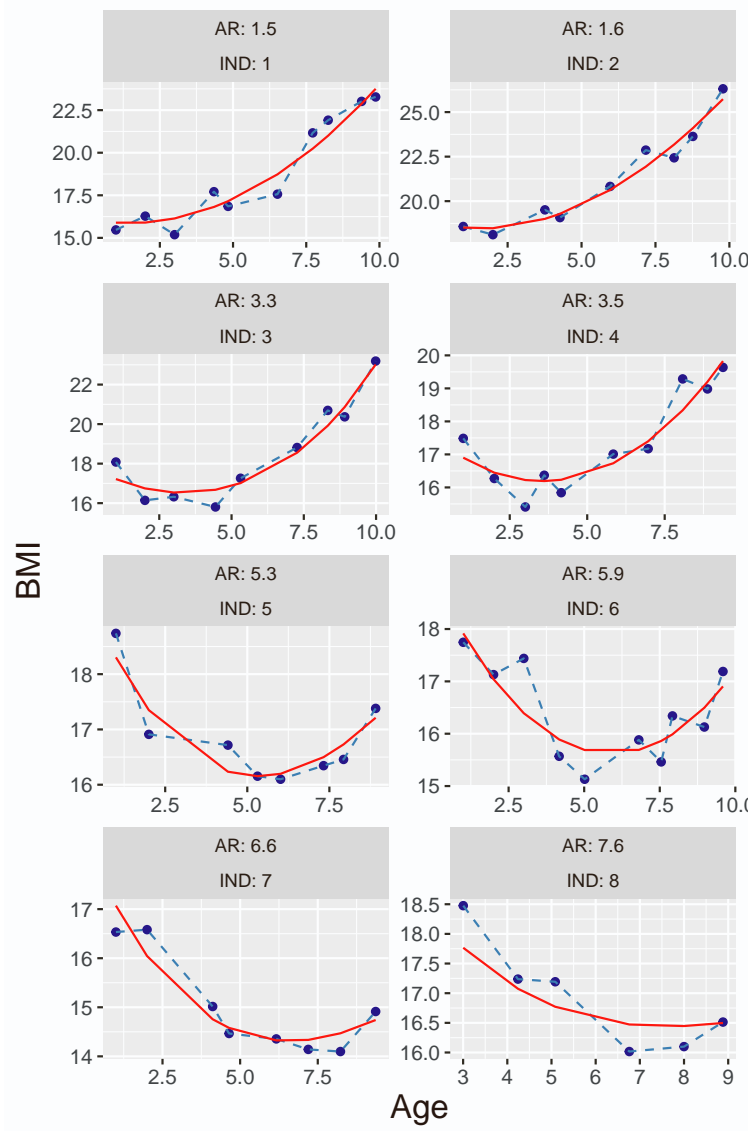

Figure S1. **Individual estimations of Age-AR and BMI-AR, Related to Figure 1.** Shown are examples of BMI trajectories for individuals with Age-AR estimations between 1.5 and 7.6 years old. Blue dotted lines represent the real data, whereas red lines represent the fit curves. Individual (IND) codes do not represent the original codes due to ethical reasons. Age-AR: Age at adiposity rebound.

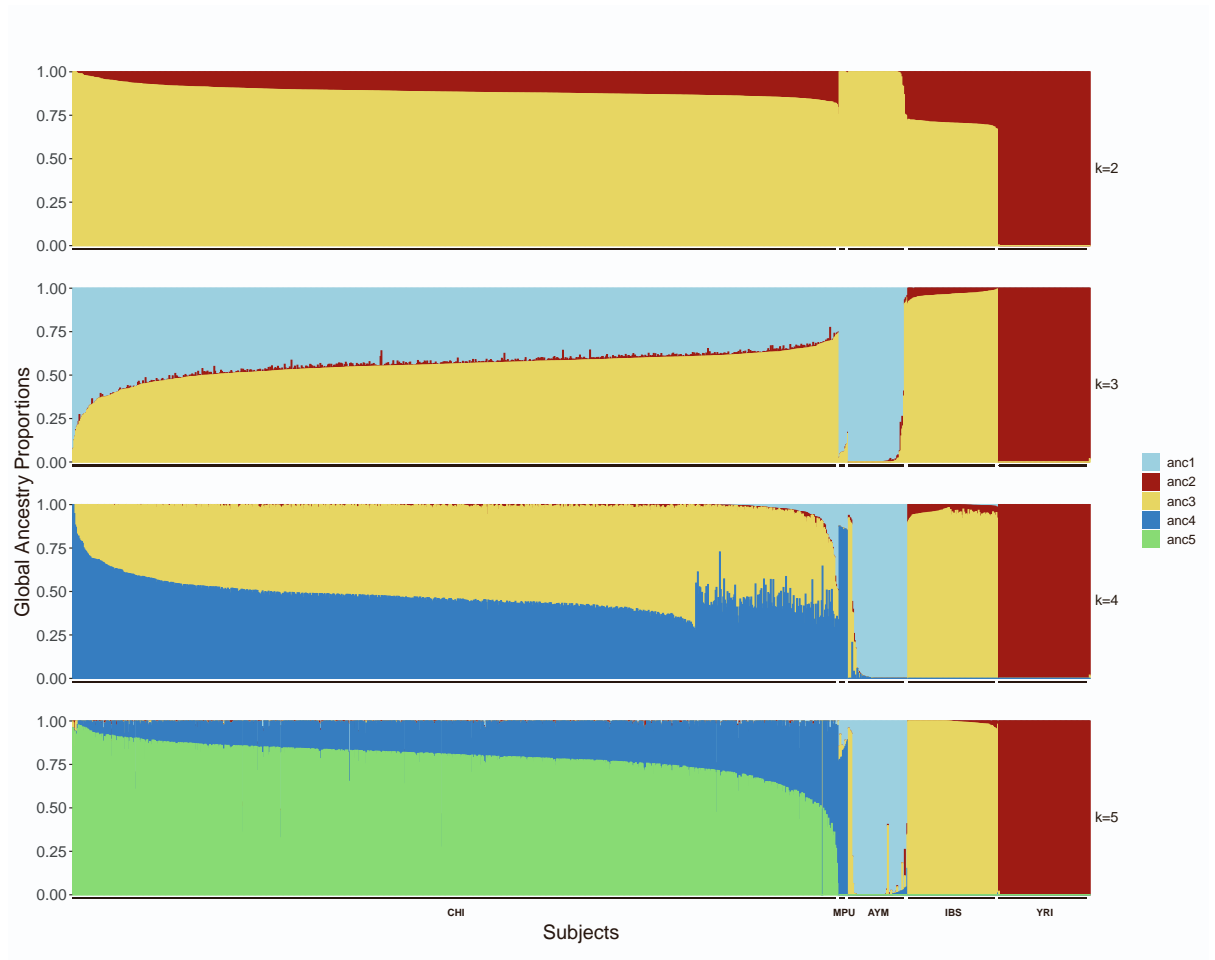

Figure S2. **Global ancestry proportions of Chilean children, Related to STAR Methods.** The number of displayed clusters is  $K=2 - 5$ . YRI: Yoruba; AYM: Aymara; CHL: Chilean; IBS: Spaniards; MPU: Mapuche.

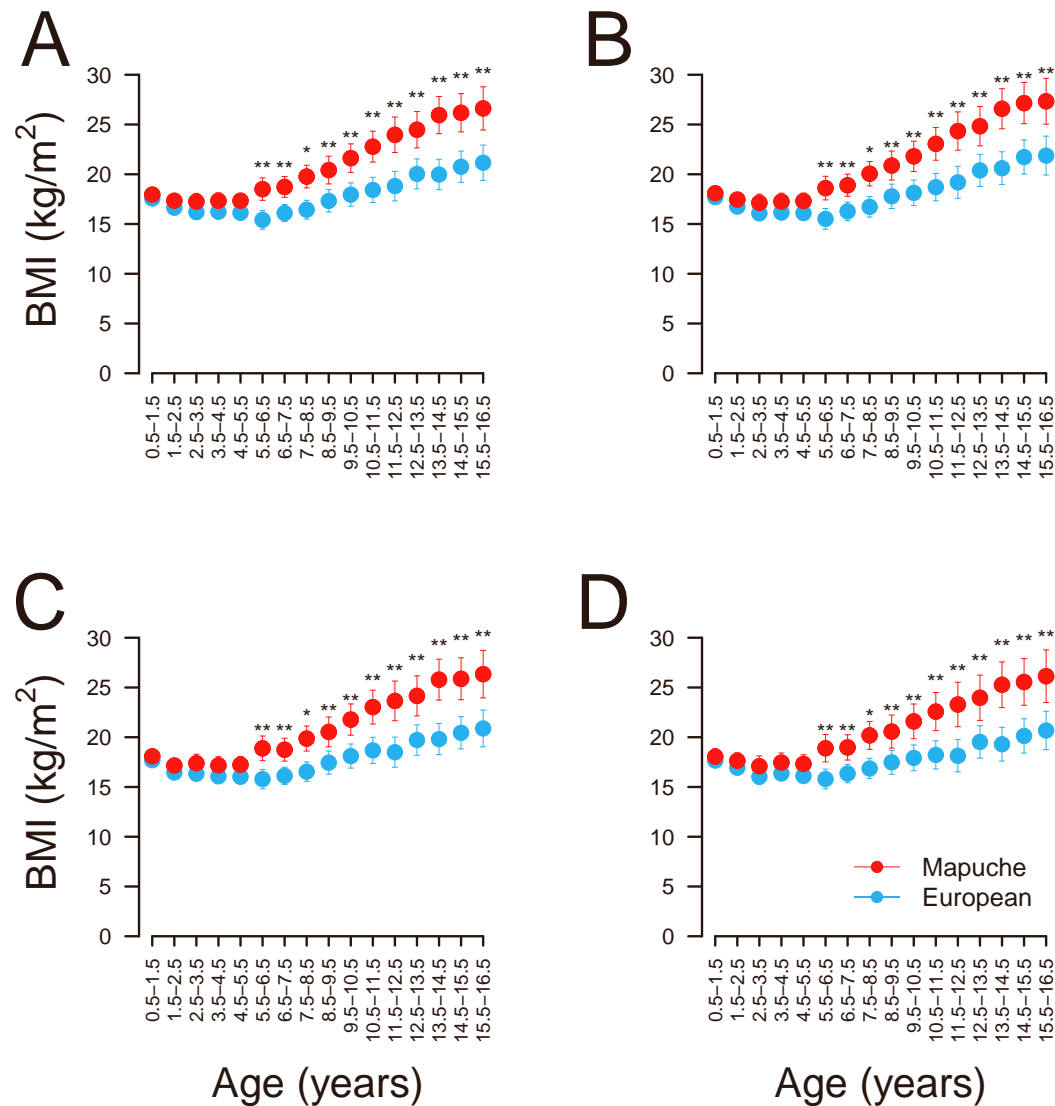

Figure S3. **Effect of global Mapuche and European ancestry on BMI trajectory in individuals grouped by MEL categories, Related to Figure 2A.** BMI (kg/m<sup>2</sup>) estimated at each age stratum for predicted individuals with 100% Mapuche (red dots) and 100% European global ancestry (blue dots), grouped by MEL categories. The 4 plots represent the 4 main groups of MEL described in the Methods, namely, Group 1 (A); Group 2 (B); Group 3 (C) and Group 4 (D). Standard error bars are included. \* $P < 0.05$ ; \*\* $P < 0.01$ .

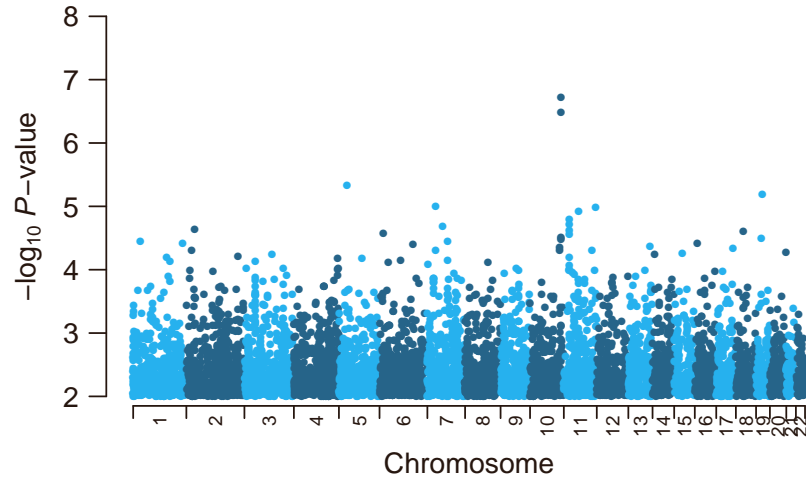

Figure S4. **GWAS of BMI in children aged 0.5-1.5 years old, Related to Figure 3.** Manhattan plot showing genome-wide per-SNP association  $P$ -values represented as  $-\log_{10} P$ -value, along the 22 autosomes. Variants with  $\log_{10}(P\text{-value})$  between 0 and 2 are not shown.

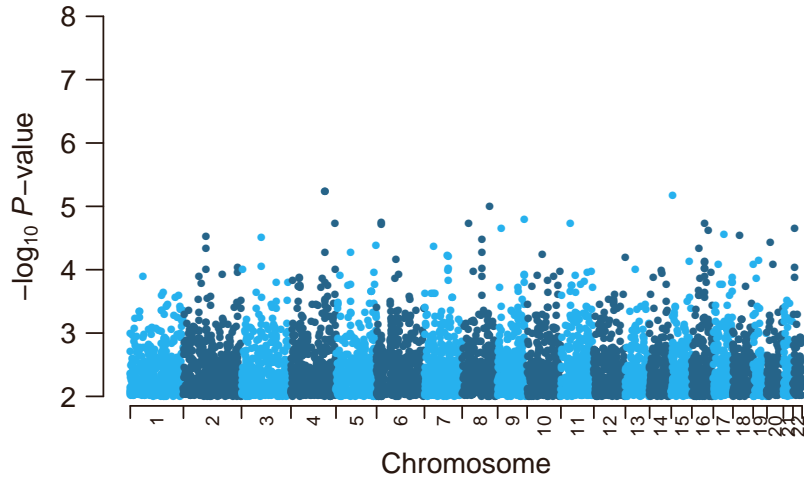

Figure S5. **GWAS of BMI in children aged 2.5-3.5 years old, Related to Figure 3.** Manhattan plot showing genome-wide per-SNP association  $P$ -values represented as  $-\log_{10} P$ -value, along the 22 autosomes. Variants with  $\log_{10}(P\text{-value})$  between 0 and 2 are not shown.

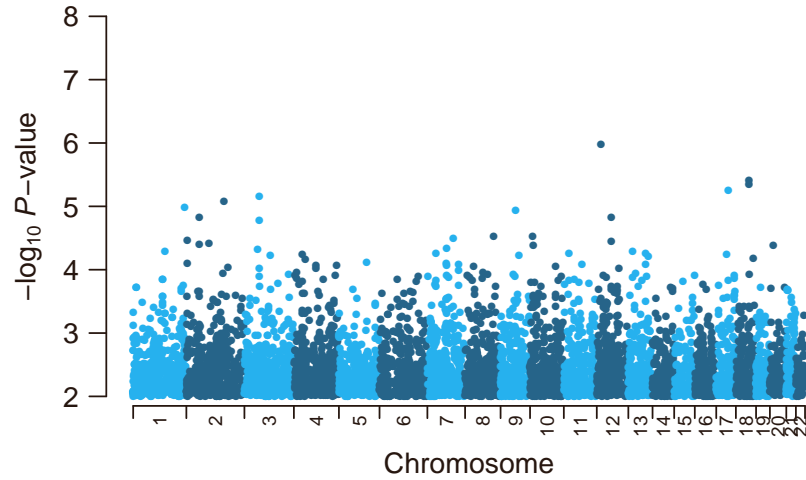

Figure S6. **GWAS of BMI in children aged 3.5-4.5 years old, Related to Figure 3.** Manhattan plot showing genome-wide per-SNP association  $P$ -values represented as  $-\log_{10} P\text{-value}$ , along the 22 autosomes. Variants with  $\log_{10}(P\text{-value})$  between 0 and 2 are not shown.

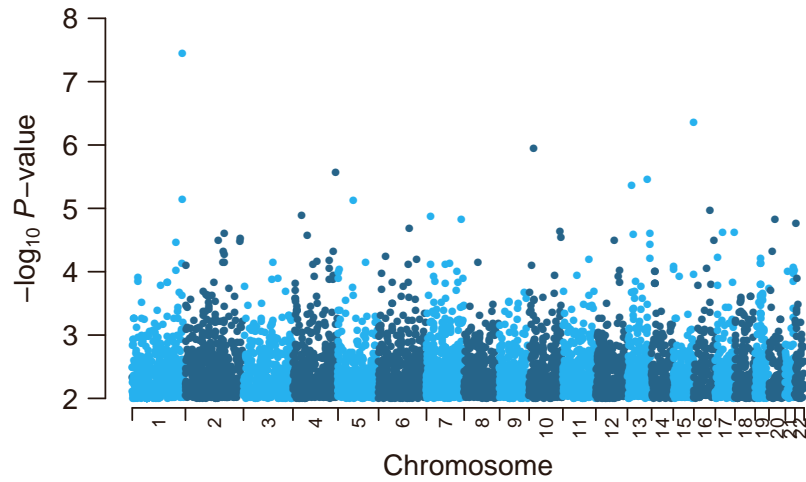

Figure S7. **GWAS of BMI in children aged 4.5-5.5 years old, Related to Figure 3.** Manhattan plot showing genome-wide per-SNP association  $P$ -values represented as  $-\log_{10} P\text{-value}$ , along the 22 autosomes. Variants with  $\log_{10}(P\text{-value})$  between 0 and 2 are not shown.



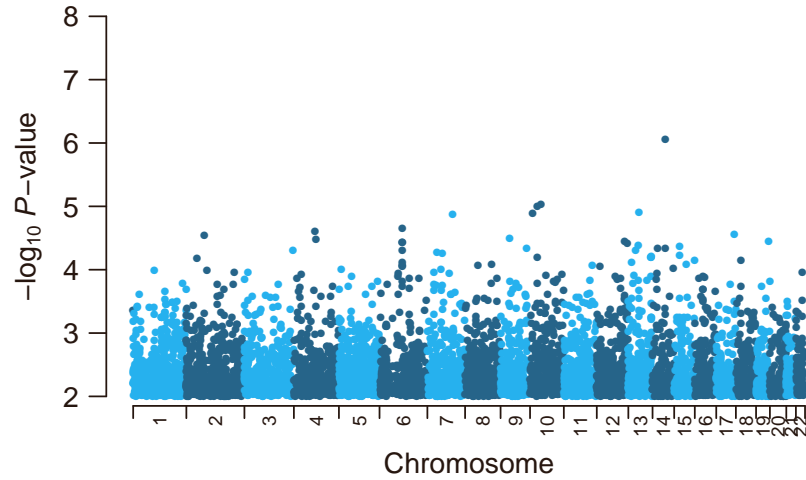

Figure S8. **GWAS of BMI in children aged 5.5-6.5 years old, Related to Figure 3.** Manhattan plot showing genome-wide per-SNP association  $P$ -values represented as  $-\log_{10} P$ -value, along the 22 autosomes. Variants with  $\log_{10}(P\text{-value})$  between 0 and 2 are not shown.

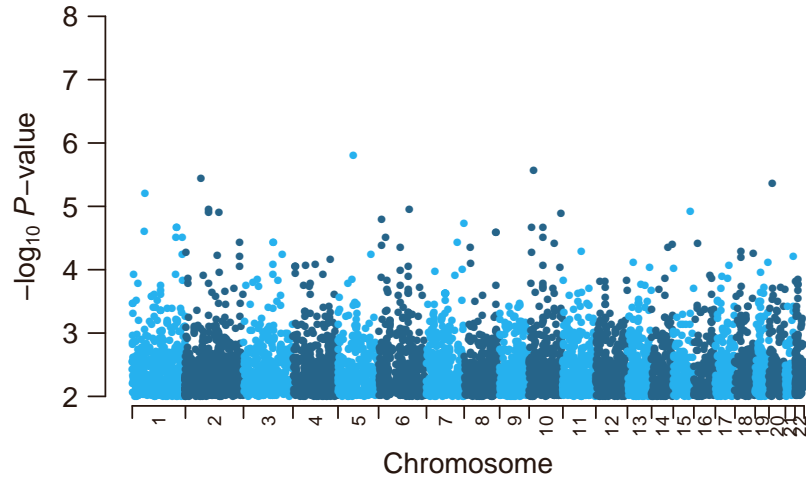

Figure S9. **GWAS of BMI in children aged 6.5-7.5 years old, Related to Figure 3.** Manhattan plot showing genome-wide per-SNP association  $P$ -values represented as  $-\log_{10} P\text{-value}$ , along the 22 autosomes. Variants with  $\log_{10}(P\text{-value})$  between 0 and 2 are not shown.

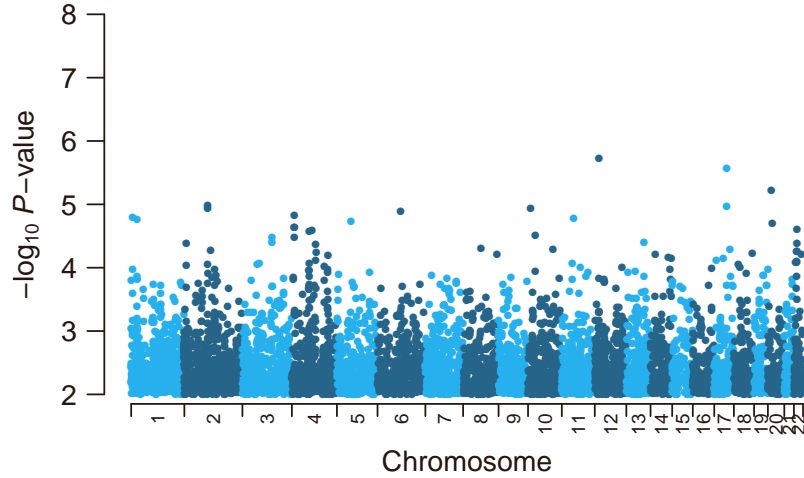

Figure S10. **GWAS of BMI in children aged 7.5-8.5 years old, Related to Figure 3.** Manhattan plot showing genome-wide per-SNP association  $P$ -values represented as  $-\log_{10} P$ -value, along the 22 autosomes. Variants with  $\log_{10}(P\text{-value})$  between 0 and 2 are not shown.

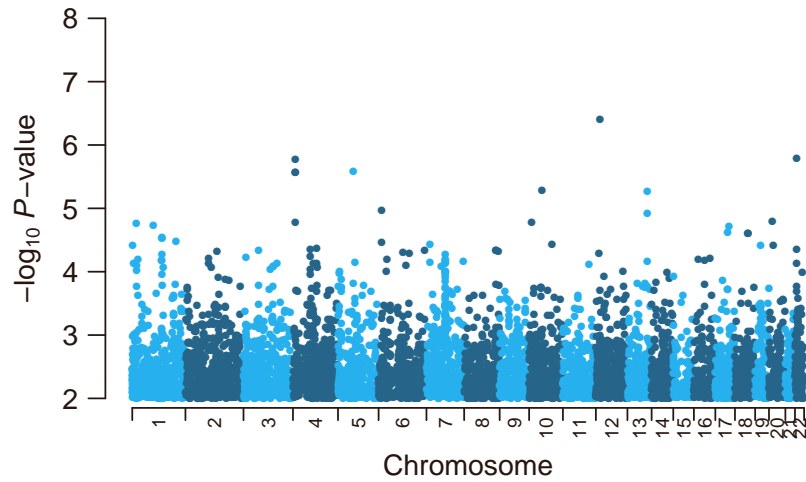

Figure S11. **GWAS of BMI in children aged 8.5-9.5 years old, Related to Figure 3.** Manhattan plot showing genome-wide per-SNP association  $P$ -values represented as  $-\log_{10} P\text{-value}$ , along the 22 autosomes. Variants with  $\log_{10}(P\text{-value})$  between 0 and 2 are not shown.

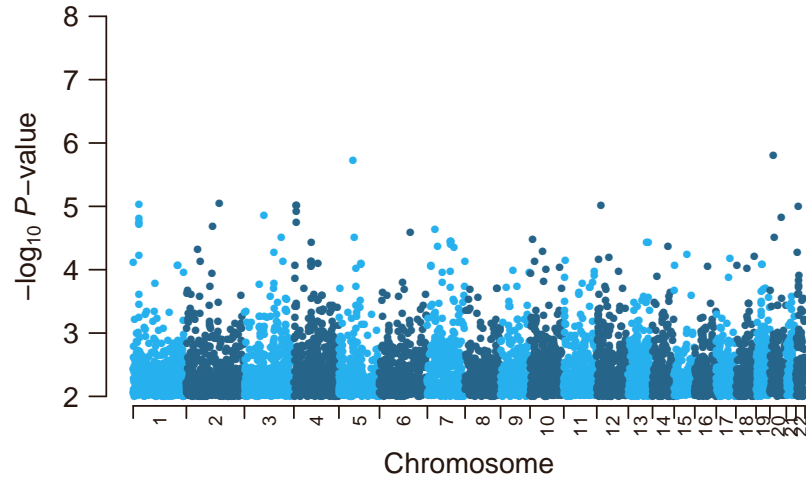

Figure S12. **GWAS of BMI in children aged 9.5-10.5 years old, Related to Figure 3.** Manhattan plot showing genome-wide per-SNP association  $P$ -values represented as  $-\log_{10} P\text{-value}$ , along the 22 autosomes. Variants with  $\log_{10}(P\text{-value})$  between 0 and 2 are not shown.

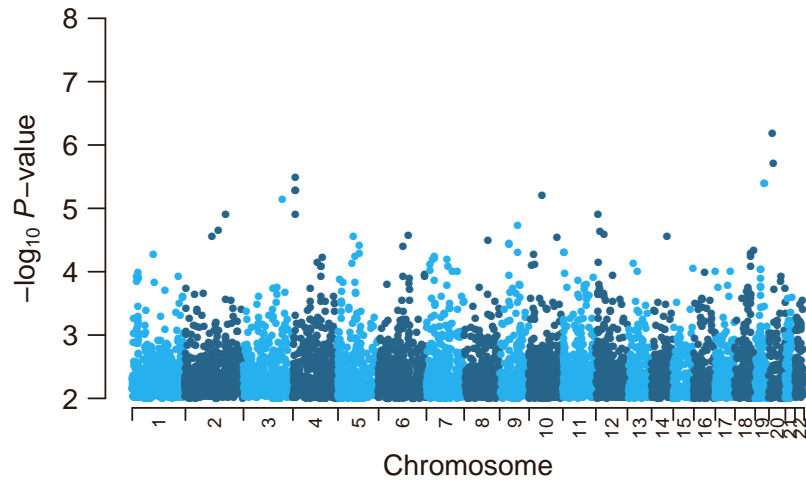

Figure S13. **GWAS of BMI in children aged 10.5-11.5 years old, Related to Figure 3.** Manhattan plot showing genome-wide per-SNP association  $P$ -values represented as  $-\log_{10} P\text{-value}$ , along the 22 autosomes. Variants with  $\log_{10}(P\text{-value})$  between 0 and 2 are not shown.

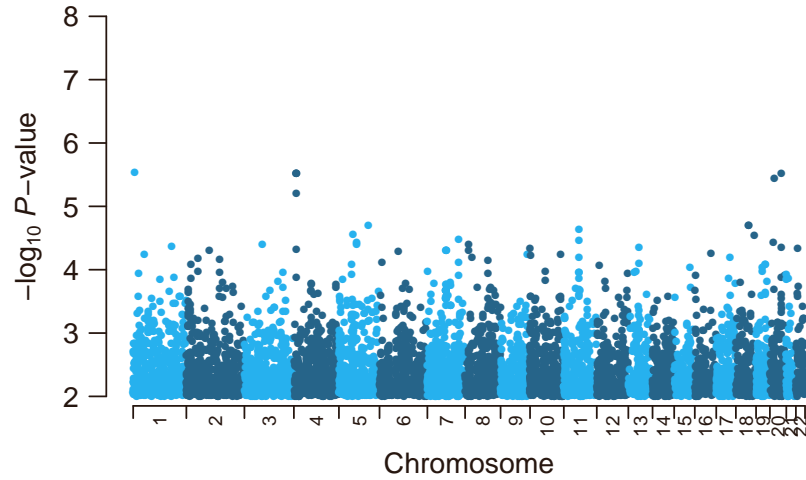

Figure S14. **GWAS of BMI in children aged 11.5-12.5 years old, Related to Figure 3.** Manhattan plot showing genome-wide per-SNP association  $P$ -values represented as  $-\log_{10} P\text{-value}$ , along the 22 autosomes. Variants with  $\log_{10}(P\text{-value})$  between 0 and 2 are not shown.

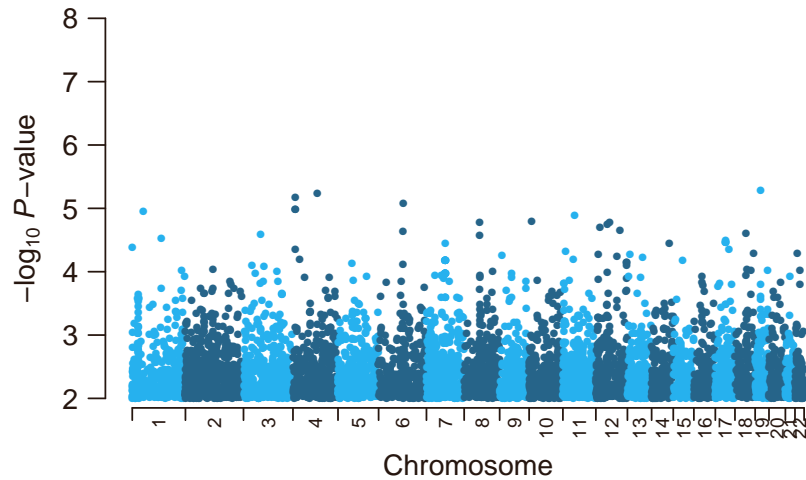

Figure S15. **GWAS of BMI in children aged 12.5-13.5 years old, Related to Figure 3.** Manhattan plot showing genome-wide per-SNP association  $P$ -values represented as  $-\log_{10} P\text{-value}$ , along the 22 autosomes. Variants with  $\log_{10}(P\text{-value})$  between 0 and 2 are not shown.



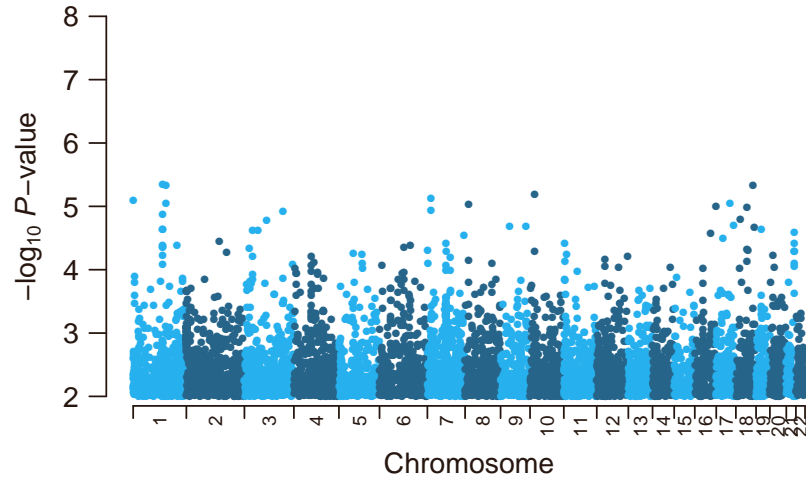

Figure S16. **GWAS of BMI in children aged 13.5-14.5 years old, Related to Figure 3.** Manhattan plot showing genome-wide per-SNP association  $P$ -values represented as  $-\log_{10} P\text{-value}$ , along the 22 autosomes. Variants with  $\log_{10}(P\text{-value})$  between 0 and 2 are not shown.

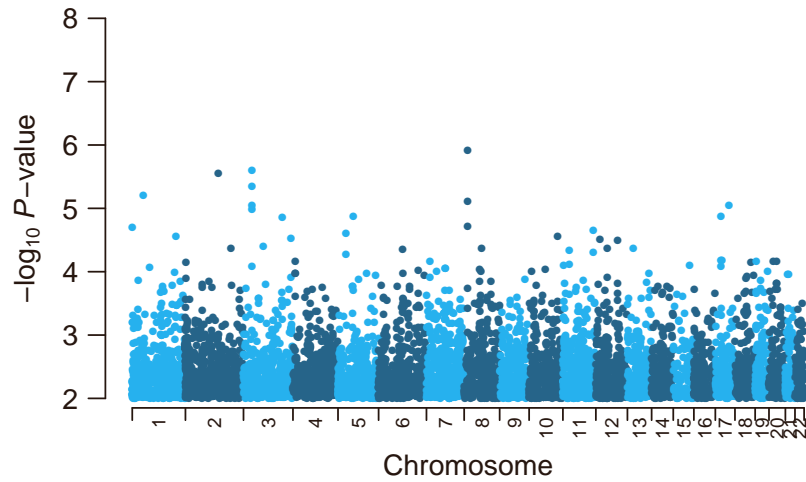

Figure S17. **GWAS of BMI in children aged 14.5-15.5 years old, Related to Figure 3.** Manhattan plot showing genome-wide per-SNP association  $P$ -values represented as  $-\log_{10} P\text{-value}$ , along the 22 autosomes. Variants with  $\log_{10}(P\text{-value})$  between 0 and 2 are not shown.

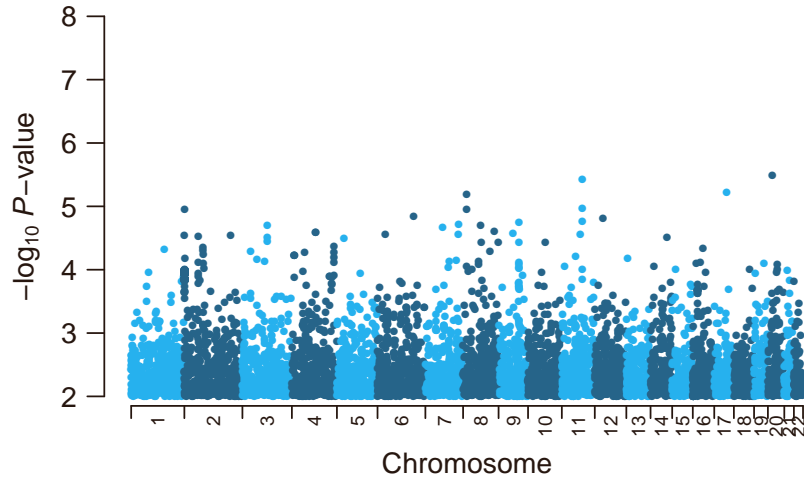

Figure S18. **GWAS of BMI in children aged 15.5-16.5 years old, Related to Figure 3.** Manhattan plot showing genome-wide per-SNP association  $P$ -values represented as  $-\log_{10} P\text{-value}$ , along the 22 autosomes. Variants with  $\log_{10}(P\text{-value})$  between 0 and 2 are not shown.

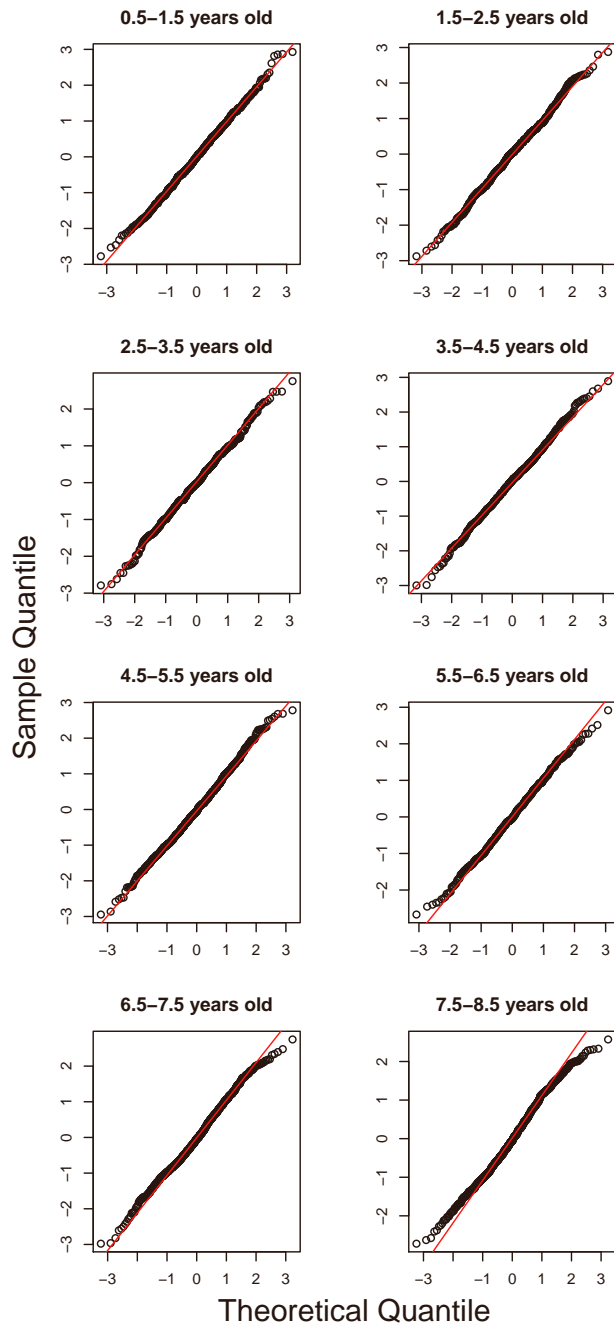

Figure S19. QQ-plots of cross-sectional GWAS across 0.5-1.5 years old to 7.5-8.5 years old strata, Related to Figure 3. The ordinate and abscissa represent the sample quantiles and the theoretical quantiles, respectively.

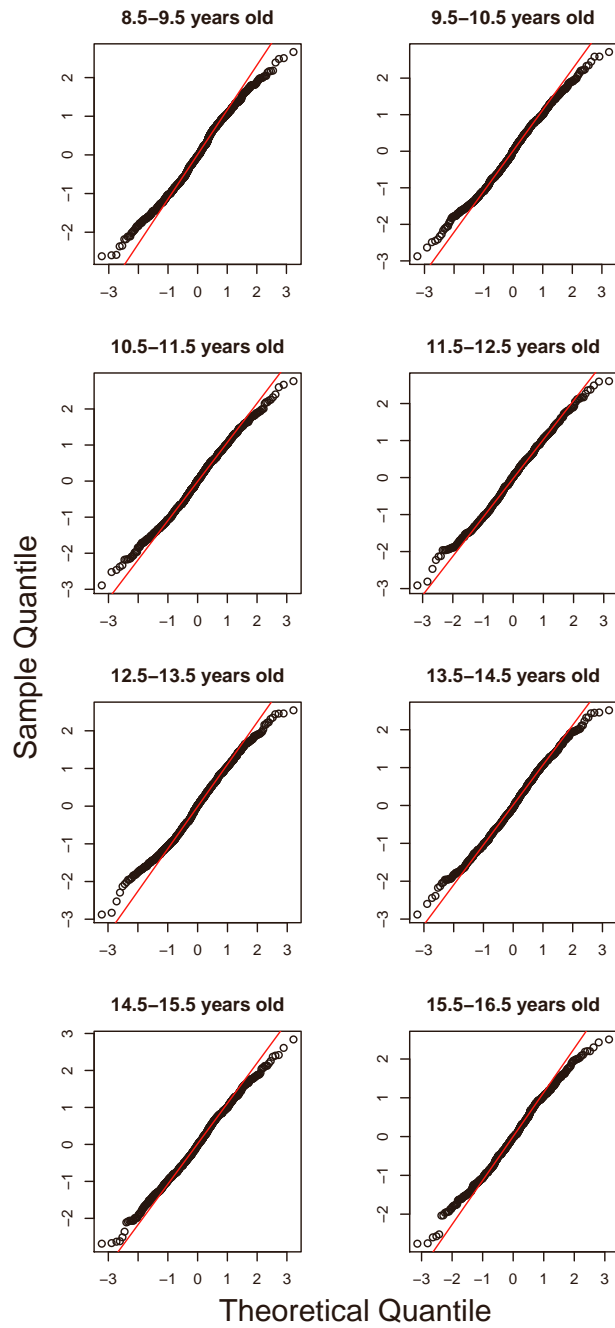

Figure S20. **QQ-plots of cross-sectional GWAS across 8.5-9.5 years old to 15.5-16.5 years old strata, Related to Figure 3.** The ordinate and abscissa represent the sample quantiles and the theoretical quantiles, respectively.

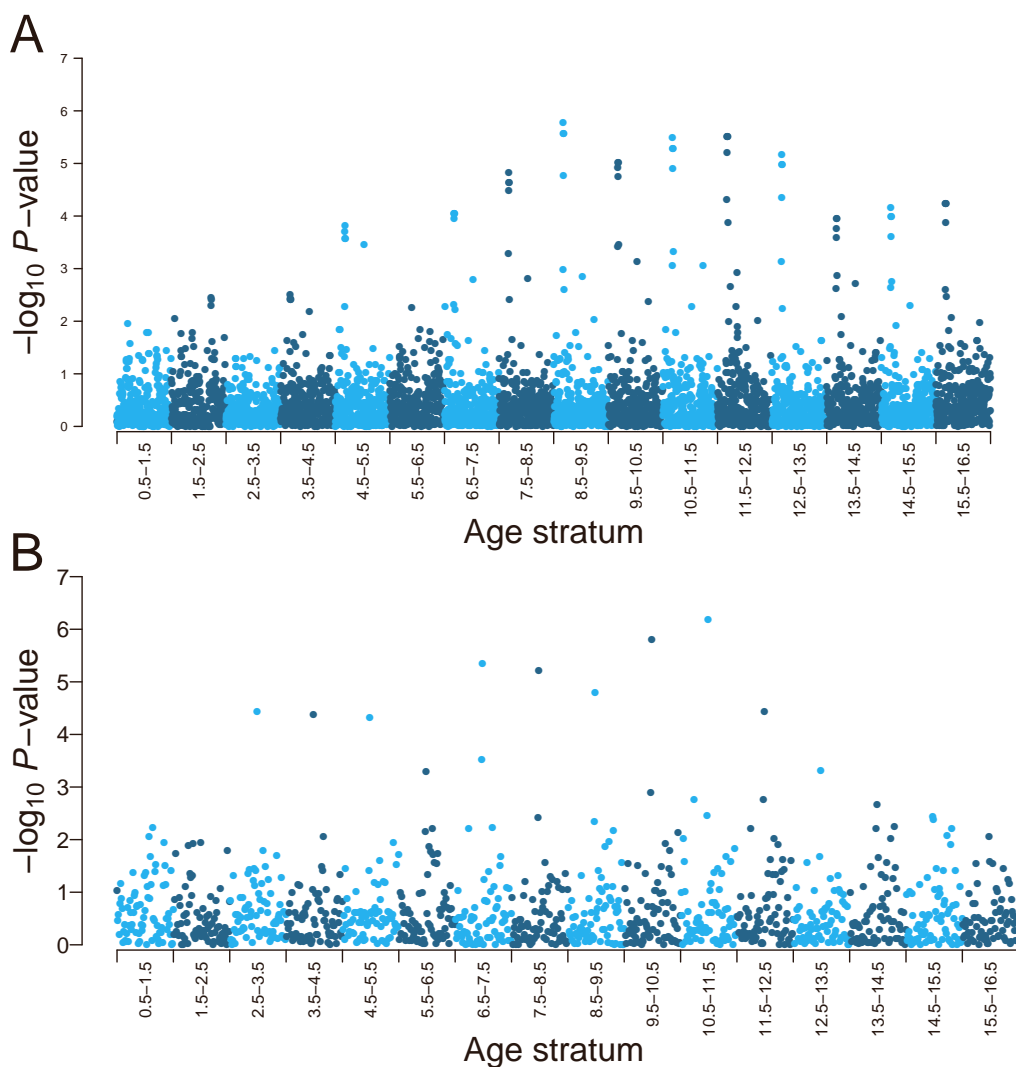

Figure S21. **Trajectories of association peaks from chromosomes 4 and 20 along age strata, Related to Figure 3.** Manhattan plots showing per-SNP association  $P$ -values represented as  $-\log_{10} P\text{-value}$ . A: Chromosome 4. The strongest association corresponds to the *rs12501266* variant of gene *SORCS2*. Shown is the region with physical coordinates 4:7440183-7310183. B: Chromosome 20. The strongest association corresponds to the *rs474169* variants of gene *SNAP25-AS1*. The region shown has physical coordinates 20:10016800-10181800.

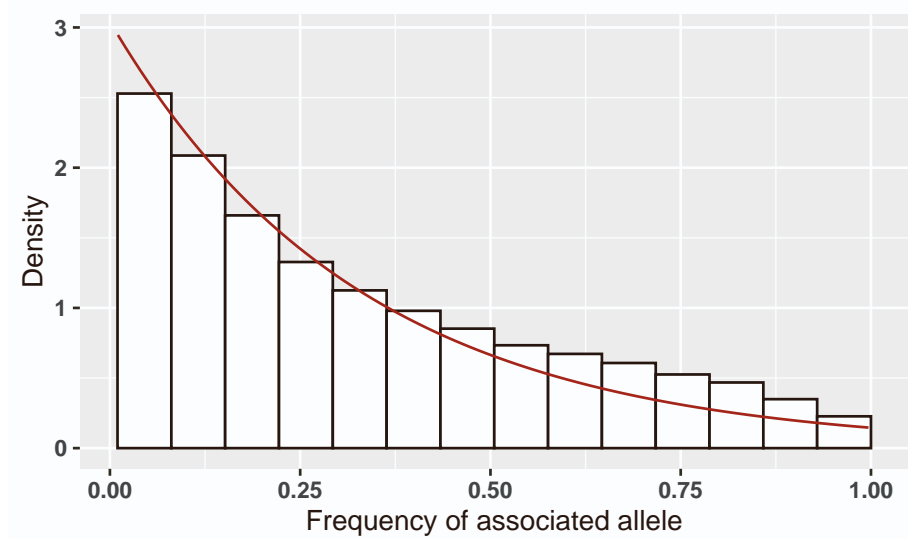

Figure S22. **Distribution of allele frequencies for the GWAS on age stratum 1.5 - 2.5 years old, Related to STAR Methods.** The histogram shows the real distribution of the allele frequencies of all SNPs. The red curve represents the exponential model fit with parameter  $\lambda = 3.041907$ . The truncated exponential distribution from which the allele frequencies were generated in the simulations, slightly under-represent frequencies between 0.5 and 0.9. We are confident that this is likely not affecting the simulations for the following reasons: i) most of the observed allele frequencies are below 0.5 (roughly 75%); ii) small  $P$ -values are more likely to be generated from extreme allele frequencies (very small or very large), and we are excluding frequencies below 0.01%; iii) frequencies at the same distance from 0.5 (to the right or left) generate the same  $P$ -values.

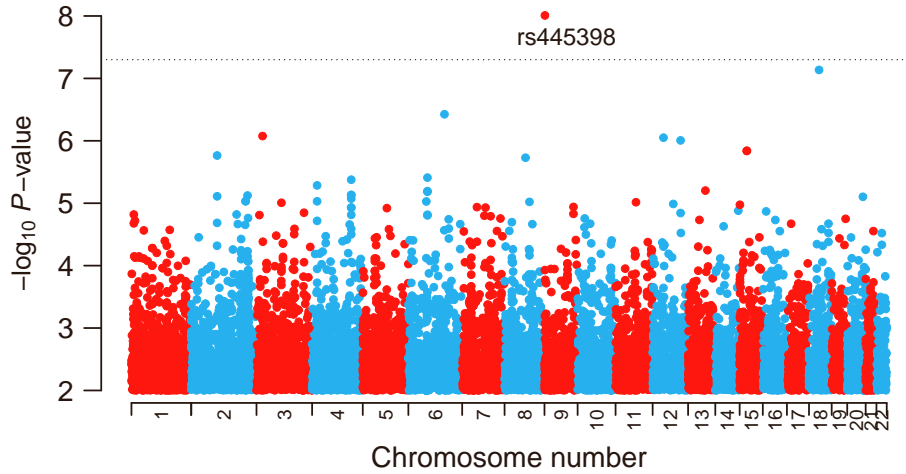

Figure S23. **GWAS of Age-AR, Related to Table 2.** Manhattan plot showing genome-wide association  $P$ -values represented as  $-\log_{10} P$ -value. Variants achieving the genome wide threshold of  $P < 5 \times 10^{-8}$  are labeled. Variants with  $\log_{10}(P\text{-value})$  between 0 and 2 are not shown. The black dotted line represents the genome wide significance threshold.



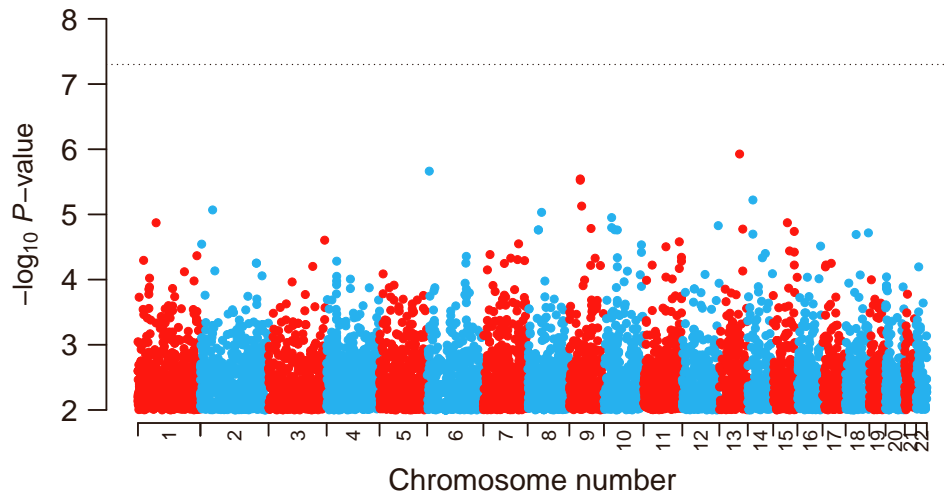

Figure S24. **GWAS of BMI-AR, Related to Table 2.** Manhattan plot showing genome-wide association  $P$ -values represented as  $-\log_{10} P$ -value. Variants with  $\log_{10}(P\text{-value})$  between 0 and 2 are not shown. The black dotted line represents the genome wide significance threshold.

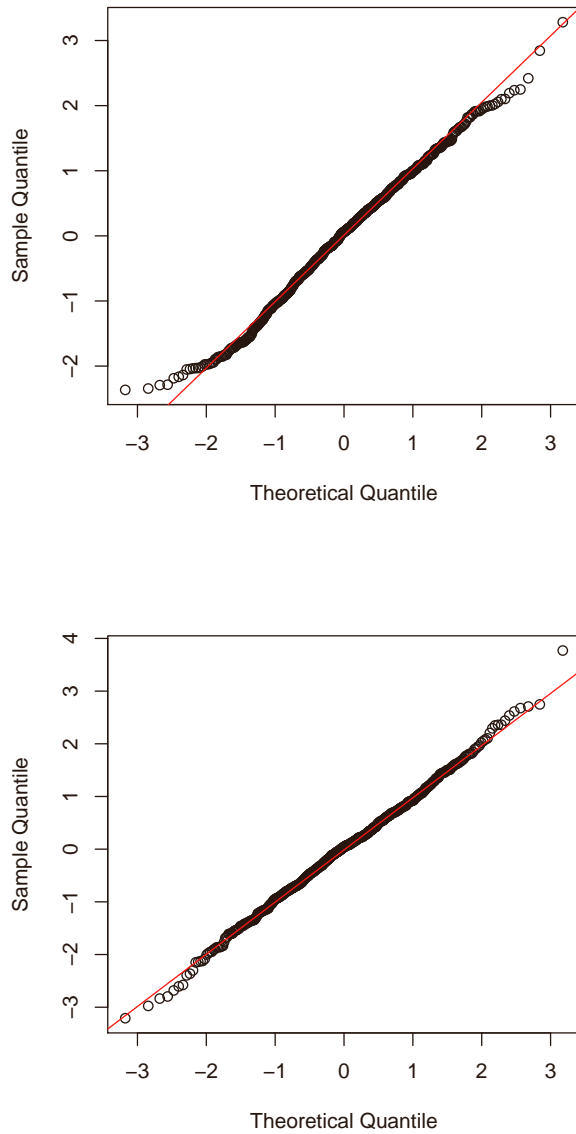

Figure S25. **QQ-plots of Age-AR and BMI-AR GWAS, Related to Table 2.** The top panel shows the QQ-plot for the GWAS on Age-AR, whereas the bottom panel shows the QQ-plot for the GWAS on BMI-AR GWAS. The ordinate and abscissa represent the sample quantiles and the theoretical quantiles, respectively.

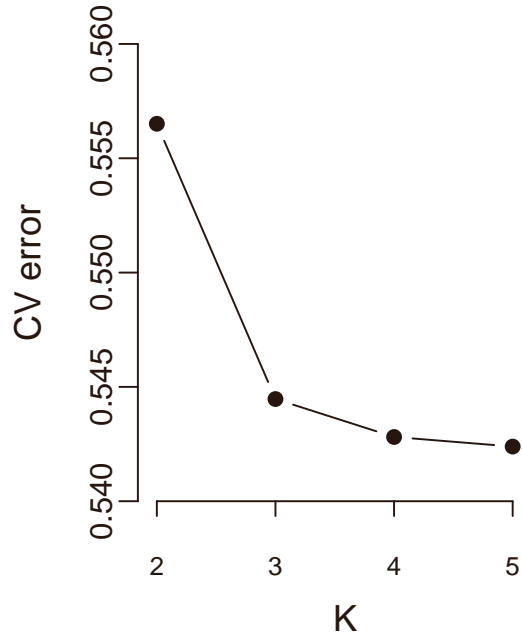

Figure S26. **Cross-validation error across K ancestral populations, Related to STAR Methods.** Cross-validation errors estimated by ADMIXTURE, using K= 2 – 5 ancestral populations.

## SUPPLEMENTAL TABLES

| Maternal Educational Level      | Maternal Educational Level<br>(Chilean education system;<br>in Spanish) | Number of<br>individuals |
|---------------------------------|-------------------------------------------------------------------------|--------------------------|
| Incomplete middle school        | Básica incompleta                                                       | 59                       |
| Complete middle school          | Básica completa                                                         | 465                      |
| Incomplete high school          | Media incompleta                                                        | 137                      |
| Complete high school            | Media completa                                                          | 2                        |
| Incomplete technical education  | Instituto profesional incompleto                                        | 46                       |
| Complete technical education    | Instituto profesional completo                                          | 101                      |
| Incomplete university education | Universitaria incompleta                                                | 9                        |
| Complete university education   | Universitaria completa                                                  | 62                       |
| Graduate studies                | Postgrado                                                               | 2                        |
| Special education               | Educación especial                                                      | 1                        |
| No studies                      | Sin estudios                                                            | 4                        |
| Does not know or does not reply | No sabe o no responde                                                   | 9                        |
| No classification               | NA                                                                      | 6                        |
| Other                           | Otro                                                                    | 1                        |

Table S1. **Maternal education level, Related to Figure 2A.** Number of individuals in each education category. The name of each category was translated into Spanish to better reflect the nomenclature of the Chilean education system.

| Age stratum | Sample size | Lambda |
|-------------|-------------|--------|
| 0.5-1.5     | 718         | -1.0   |
| 1.5-2.5     | 684         | -1.3   |
| 2.5-3.5     | 504         | -1.6   |
| 3.5-4.5     | 642         | -2.0   |
| 4.5-5.5     | 788         | -2.0   |
| 5.5-6.5     | 483         | -1.8   |
| 6.5-7.5     | 803         | -1.7   |
| 7.5-8.5     | 829         | -1.4   |
| 8.5-9.5     | 828         | -1.0   |
| 9.5-10.5    | 841         | -0.6   |
| 10.5-11.5   | 795         | -0.5   |
| 11.5-12.5   | 667         | -0.7   |
| 12.5-13.5   | 748         | -0.7   |
| 13.5-14.5   | 782         | -1.1   |
| 14.5-15.5   | 780         | -1.1   |
| 15.5-16.5   | 587         | -1.1   |

Table S2. **BMI estimation by age stratum in Mapuche and European individuals, Related to Figure 2A.** Shown are the age stratum; number of individuals; and  $\lambda$  used in Box-Cox transformations for each age stratum.

| <b>Significance</b> | <b>Observed</b> | <b>Simulated 95% CI [L, U]</b> |
|---------------------|-----------------|--------------------------------|
| P < 1E-1            | 115595          | 115893 [115691, 116096]        |
| P < 1E-2            | 29334           | 28349 [28261, 28437]           |
| P < 1E-3            | 4640            | 4167 [4134, 4199]              |
| P < 1E-4            | 635             | 525 [508, 542]                 |
| P < 1E-5            | 62              | 60 [53, 68]                    |
| P < 1E-6            | 11              | 7 [5, 8]                       |
| P < 1E-7            | 0               | 0 [0, 1]                       |
| P < 1E-8            | 0               | 0 [0, 0]                       |

Table S3. **Simulations results of cross-sectional GWAS, Related to Table 1.** SNP counts for the observed and expected (simulated) associated SNPs across different  $P$ -value ranges at any age stratum. Shown are the lower (L) and upper (U) limits of the 95% confidence intervals for the simulated data under the null hypothesis of no association.

| <b>SNP ID-Allele</b> | <b>Age stratum</b> | <b>Sample size</b> | <b>Effect size</b> | <b>Statistical power</b> |
|----------------------|--------------------|--------------------|--------------------|--------------------------|
| <i>rs269511-G</i>    | (1.5,2.5]          | 684                | -0.272             | 0.655                    |
| <i>rs9275582-T</i>   | (1.5,2.5]          | 684                | 0.297              | 0.662                    |
| <i>rs9275593-A</i>   | (1.5,2.5]          | 684                | 0.297              | 0.662                    |
| <i>rs9275595-C</i>   | (1.5,2.5]          | 684                | 0.297              | 0.662                    |
| <i>rs7134291-A</i>   | (8.5,9.5]          | 828                | -0.332             | 0.831                    |
| <i>rs7896870-C</i>   | (0.5,1.5]          | 718                | 0.250              | 0.843                    |
| <i>rs474169-T</i>    | (10.5,11.5]        | 795                | -0.285             | 0.755                    |
| <i>rs1495271-T</i>   | (4.5,5.5]          | 788                | 0.256              | 0.476                    |
| <i>rs11244839-A</i>  | (0.5,1.5]          | 718                | 0.248              | 0.824                    |
| <i>rs13257360-A</i>  | (14.5,15.5]        | 780                | 0.280              | 0.992                    |

Table S4. **Statistical power of associations from cross-sectional GWAS, Related to Table 1.** Shown are the SNP ID and their associated alleles, age stratum, sample size, effect size and the statistical power. The calculations are described in the Methods.

| SNP ID-Allele       | Location     | Consequence | Gene               | $\beta$ -GT | $P$ -GT | Frequency |
|---------------------|--------------|-------------|--------------------|-------------|---------|-----------|
| <i>rs4655426-T</i>  | 1:215893063  | intron      | <i>USH2A</i>       | -4.93       | 9.8E-07 | 0.162     |
| <i>rs79316274-C</i> | 13:57529593  | intergenic  | -                  | 4.74        | 2.4E-06 | 0.013     |
| <i>rs75032037-T</i> | 13:57426033  | intergenic  | -                  | 4.72        | 2.8E-06 | 0.014     |
| <i>rs11545026-T</i> | 15:57842525  | 3'UTR       | <i>CGNL1</i>       | 4.66        | 3.6E-06 | 0.014     |
| <i>rs1058511-C</i>  | 19:55859439  | 3'UTR       | <i>SUV420H2</i>    | -4.58       | 5.4E-06 | 0.470     |
| <i>rs6770886-G</i>  | 3:152675646  | intergenic  | -                  | -4.57       | 5.7E-06 | 0.289     |
| <i>rs45520932-T</i> | 11:115103597 | intron      | <i>CADM1</i>       | 4.48        | 8.3E-06 | 0.162     |
| <i>rs1403501-C</i>  | 3:152674921  | intergenic  | -                  | -4.48       | 8.4E-06 | 0.287     |
| <i>rs79523360-A</i> | 4:73424464   | intron      | <i>ADAMTS3</i>     | 4.41        | 1.2E-05 | 0.017     |
| <i>rs7822543-C</i>  | 8:65186350   | intron/NCT  | <i>RP11-32K4.1</i> | 4.41        | 1.2E-05 | 0.014     |

Table S5. **Strongest associations in the GWAS for longitudinal BMI, Related to STAR Methods.** Shown is the SNP rs ID with the associated allele, physical position in the chromosome, SO consequence type, gene, effect size of the genotype ( $\beta_{GT}$ ) with the corresponding association  $P$ -value ( $P_{GT}$ ), and the frequency of the associated allele. NCT: noncoding transcript variant.

| SNP.ID-Allele        | Location    | Consequence | Gene              | $\beta$ -GTxSex | $P$ -GTxSex | Frequency |
|----------------------|-------------|-------------|-------------------|-----------------|-------------|-----------|
| <i>rs2183606-A</i>   | 13:92804506 | intron      | <i>GPC5</i>       | -4.90           | 1.2E-06     | 0.453     |
| <i>rs6926791-A</i>   | 6:5169584   | intron      | <i>LYRM4</i>      | 4.78            | 2.2E-06     | 0.040     |
| <i>rs10812580-A</i>  | 9:27383756  | intron      | <i>MOB3B</i>      | 4.72            | 2.9E-06     | 0.259     |
| <i>rs13283804-G</i>  | 9:27391922  | intron      | <i>MOB3B</i>      | 4.71            | 3.0E-06     | 0.284     |
| <i>rs76077232-C</i>  | 14:34930273 | intron      | <i>SPTSSA</i>     | 4.56            | 6.0E-06     | 0.013     |
| <i>rs141739085-C</i> | 9:32332364  | downstream  | <i>SLC25A5P8</i>  | 4.52            | 7.4E-06     | 0.137     |
| <i>rs1464005-G</i>   | 2:34238100  | intron/NCT  | <i>AC009499.1</i> | -4.49           | 8.5E-06     | 0.346     |
| <i>rs73230790-A</i>  | 8:31052352  | intergenic  | -                 | -4.47           | 9.3E-06     | 0.220     |
| <i>rs10734038-T</i>  | 10:18436515 | intron      | <i>CACNB2</i>     | -4.43           | 1.1E-05     | 0.436     |
| <i>rs72731396-T</i>  | 15:72321999 | intron      | <i>MYO9A</i>      | -4.39           | 1.3E-05     | 0.236     |

Table S6. **Strongest associations for BMI-AR GWAS, Related to STAR Methods.** Shown is the SNP rs ID with the associated allele, physical position in the chromosome, SO consequence type, gene, effect size of the interaction between genotype and female sex ( $\beta_{GTxSex}$ ) with the corresponding association  $P$ -value ( $P_{GTxSex}$ ), and the frequency of the associated allele. NCT: noncoding transcript variant.
